# Supplementary material
Source: ML conference proceedings conference paper supplement (https://aclanthology.org/2026.semeval-1.160)

Macro-avg F1 (unweighted mean over 22 languages)

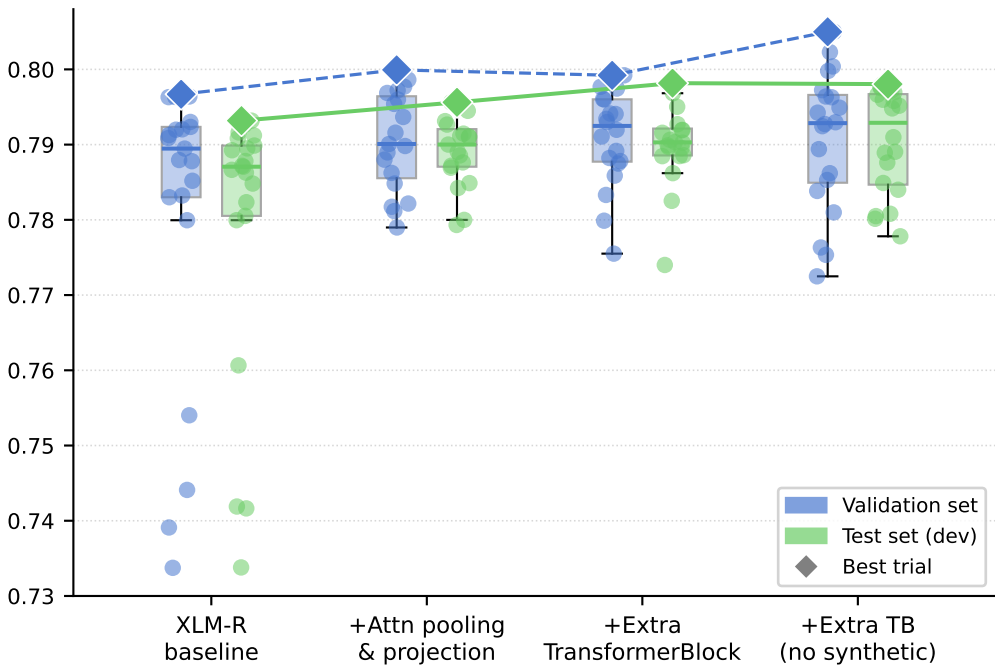

Supplement: SupplementaryMaterial [file ablation_architecture.pdf › ablation_architecture.pdf]
